# Supplementary material for: EPC-exosomal miR-26a-5p improves airway remodeling in COPD by inhibiting ferroptosis of bronchial epithelial cells via PTGS2/PGE2 signaling pathway
Source: PubMed Central journal article supplement (PMC10104834; doi:10.1038/s41598-023-33151-w), 2023-04-14
Supplement: 41598_2023_33151_MOESM2_ESM.pdf [file 41598_2023_33151_MOESM2_ESM.pdf]

TfR (90KD)

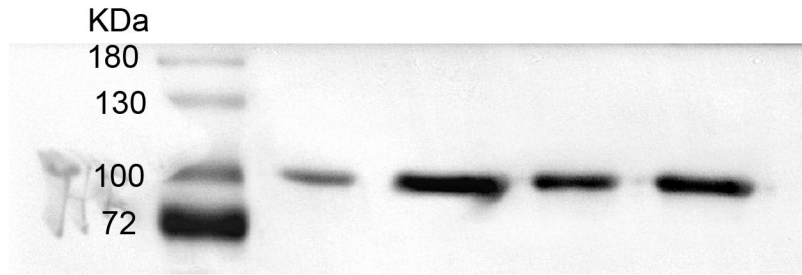

FtL (20-22KD)

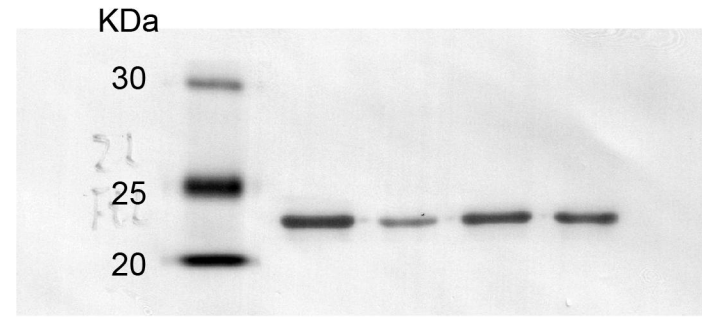

GPX4 (20KD)

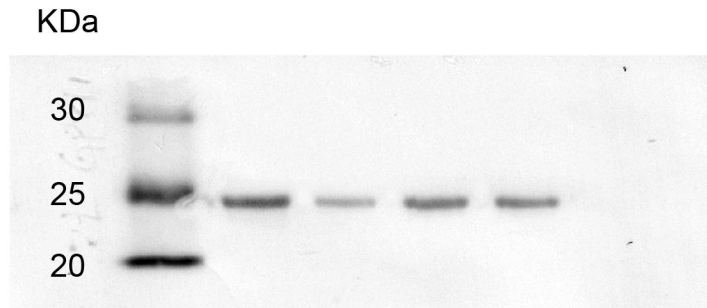

$\beta$ -actin (42KD)

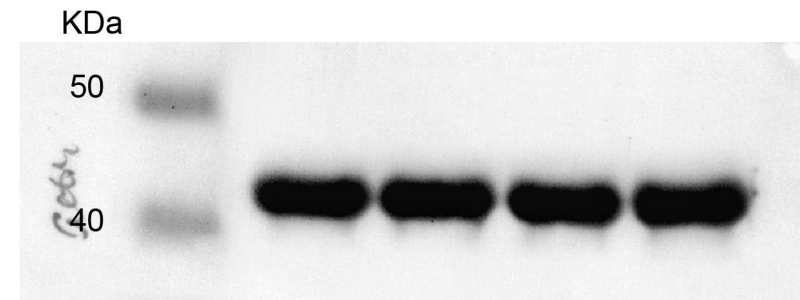

Original Image for Fig 1D

TfR (90KD)

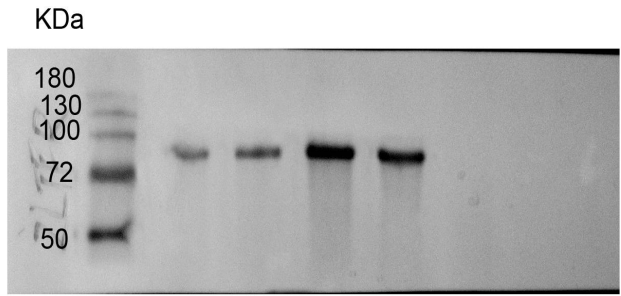

FtL (20-22KD)

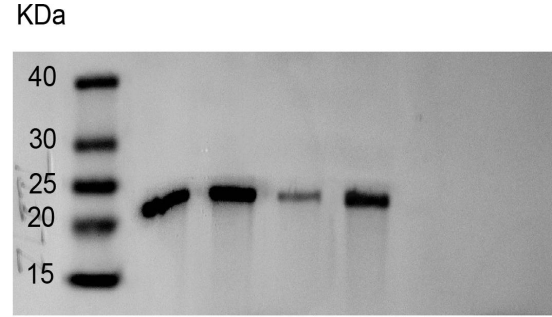

Vimentin (54KD)

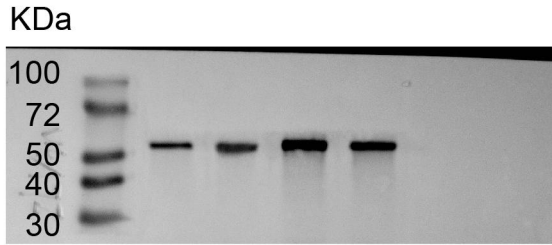

E-cadherin (125KD)

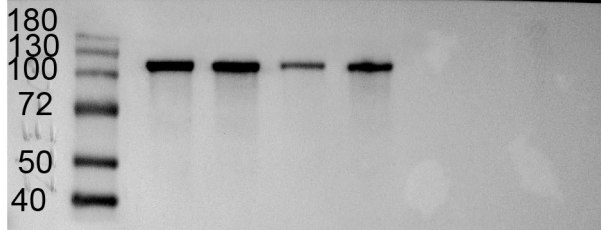

GPX4 (20KD)

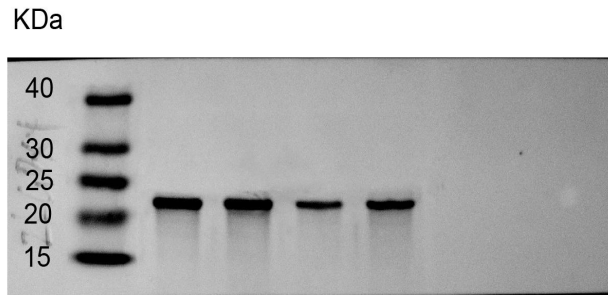

$\beta$ -actin (42KD)

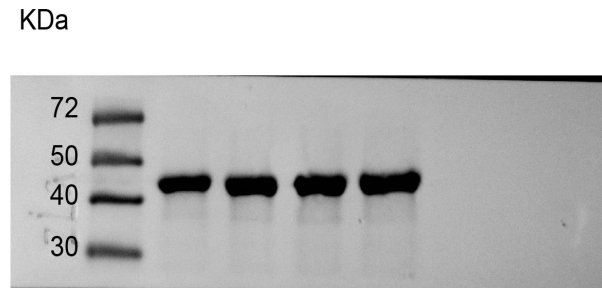

ZO-1 (220KD)

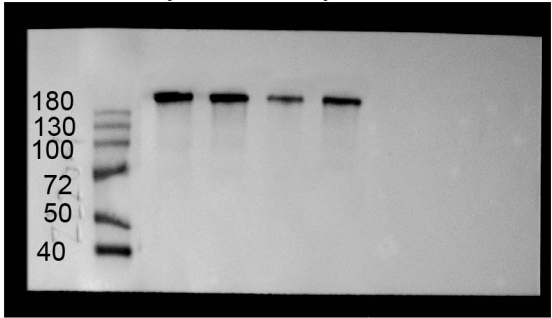

$\beta$ -actin (42KD)

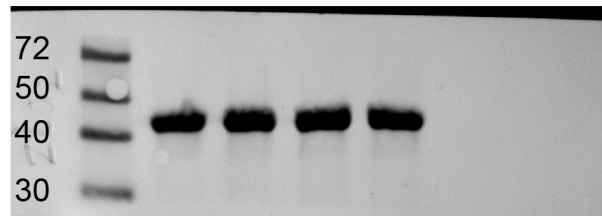

Original Image for Fig 2D

Original Image for Fig 3C

### TfR (90KD)

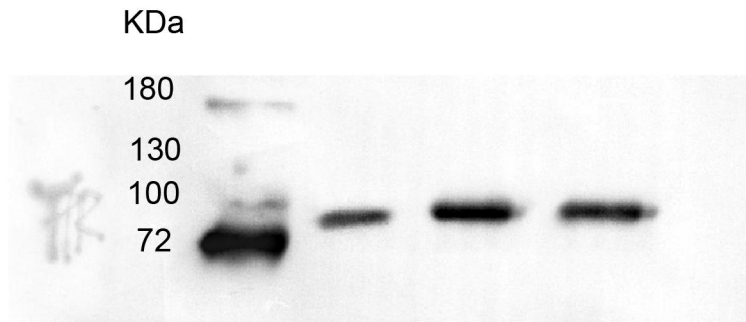

### FtL (20-22KD)

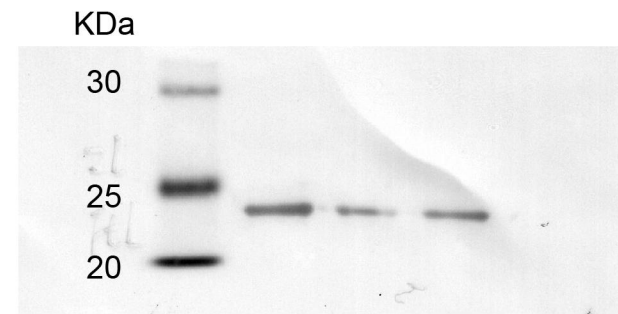

### GPX4 (20KD)

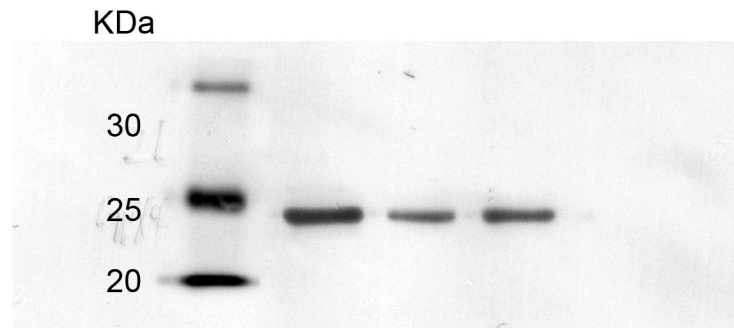

### $\beta$ -actin (42KD)

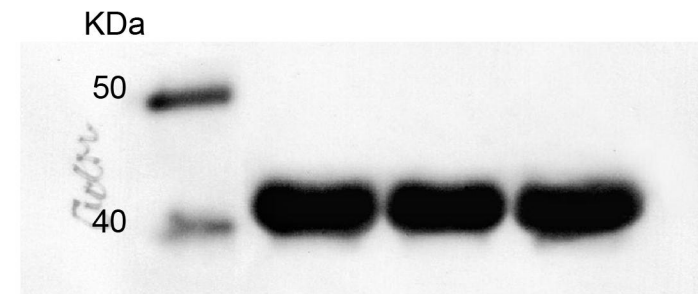

Original Image for Fig 4D

Vimentin (54KD)

KDa

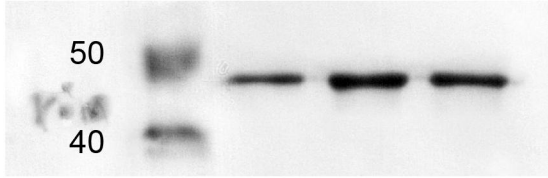

E-cadherin (125KD)

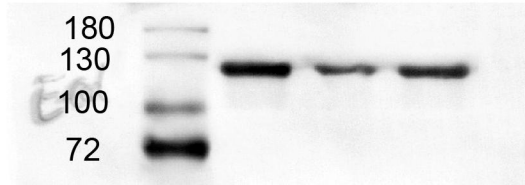

ZO-1 (220KD)

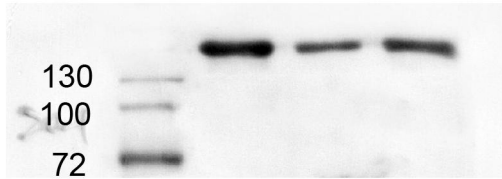

$\beta$ -actin (42KD)

KDa

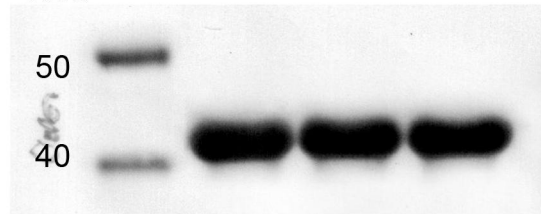

Original Image for Fig 4E

PTGS2 (69KD)

KDa

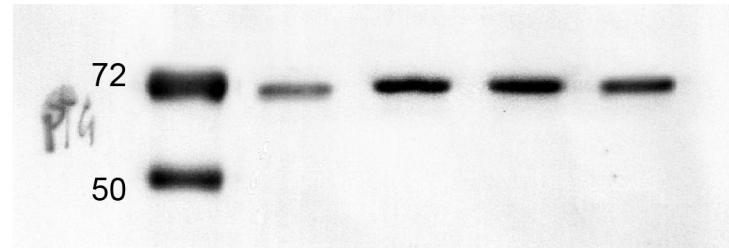

$\beta$ -actin (42KD)

KDa

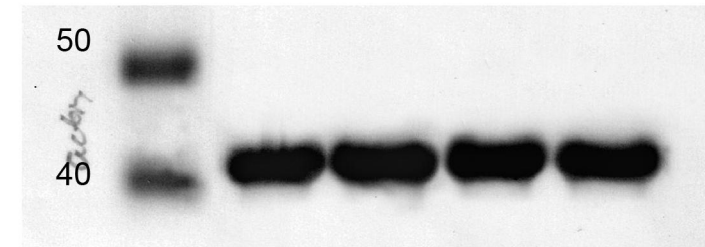

Original Image for Fig 5C

TfR (90KD)

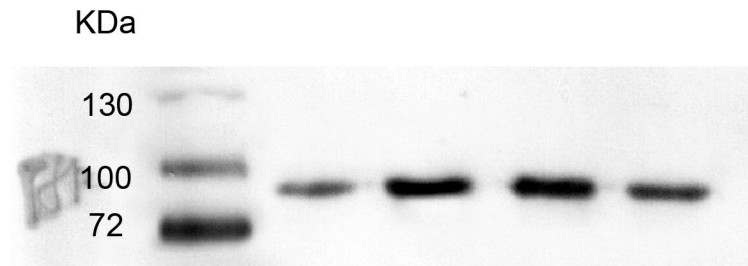

FtL (20-22KD)

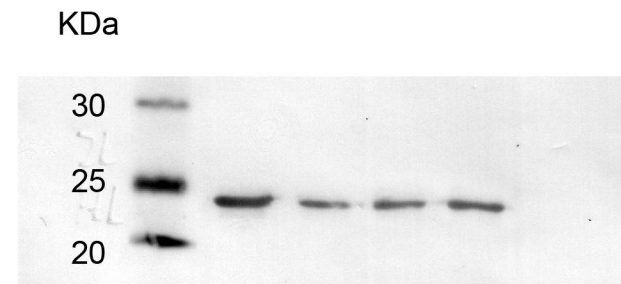

GPX4 (20KD)

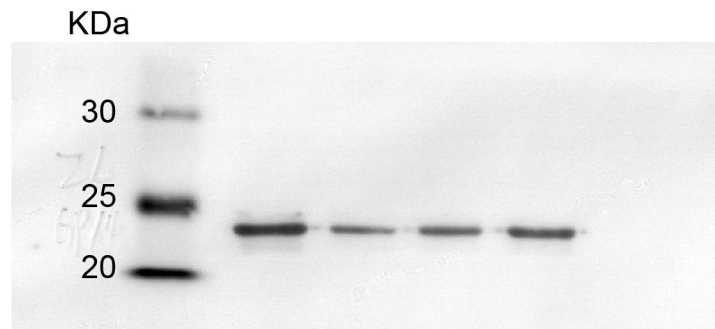

$\beta$ -actin (42KD)

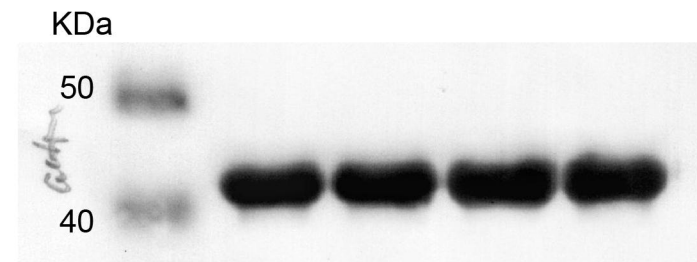

Original Image for Fig 5F

PTGS2 (69KD)

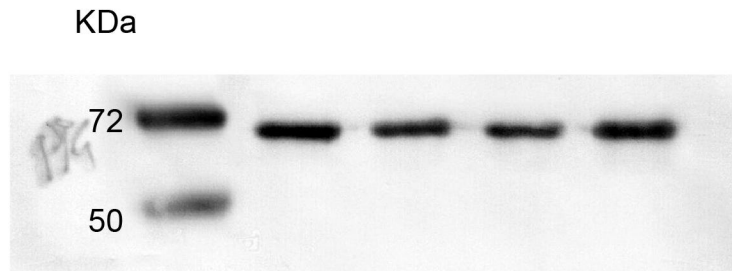

$\beta$ -actin (45KD)

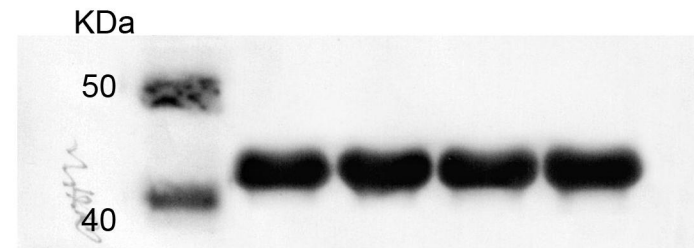

Original Image for Fig 6C

TfR (90KD)

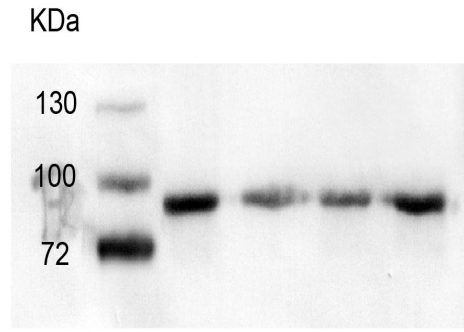

FtL (20-22KD)

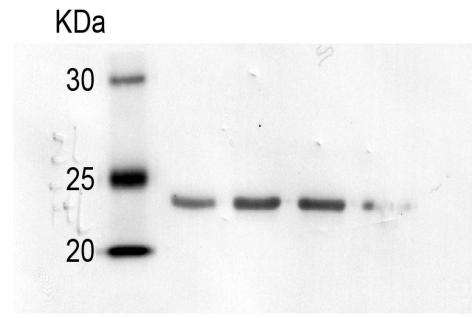

Vimentin (54KD)

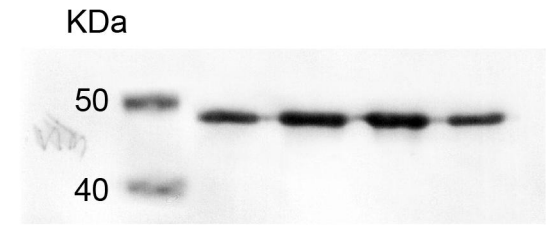

E-cadherin (125KD)

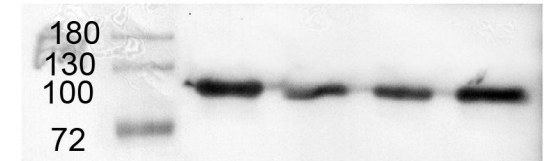

ZO-1 (220KD)

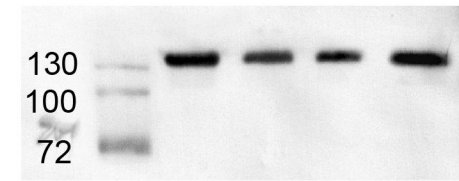

GPX4 (20KD)

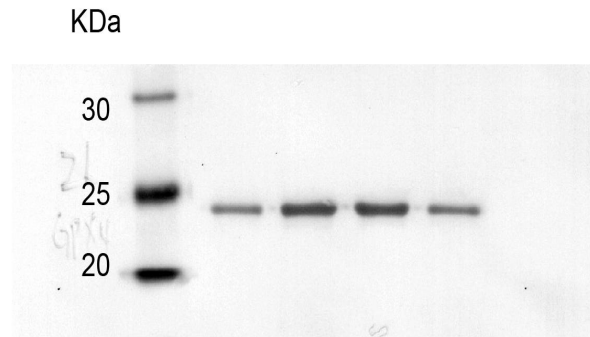

$\beta$ -actin (42KD)

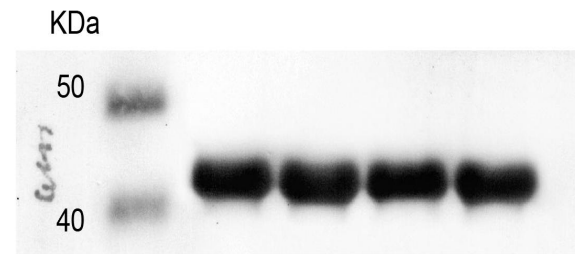

$\beta$ -actin (42KD)

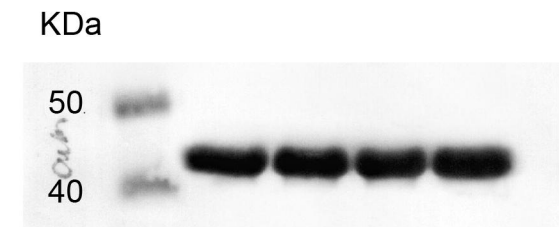

Original Image for Fig 6F

Original Image for Fig 7B

PTGS2 (69KD)

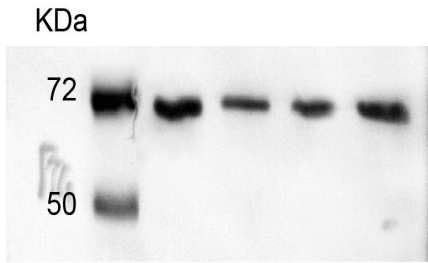

TfR (90KD)

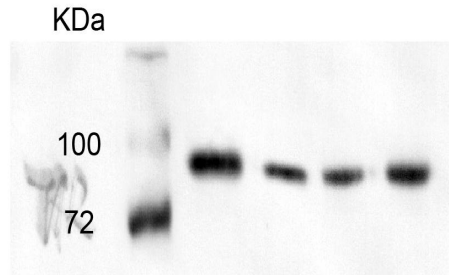

Vimentin (54KD)

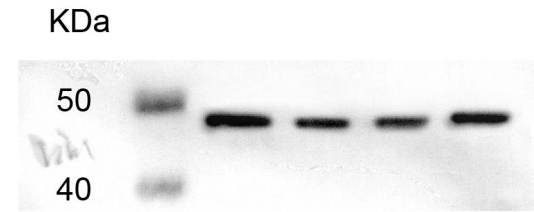

FtL (20-22KD)

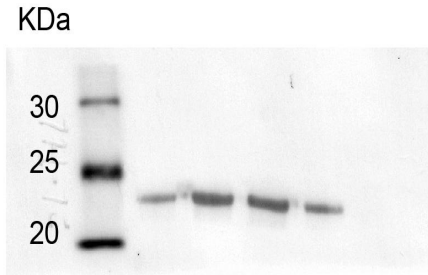

GPX4 (20KD)

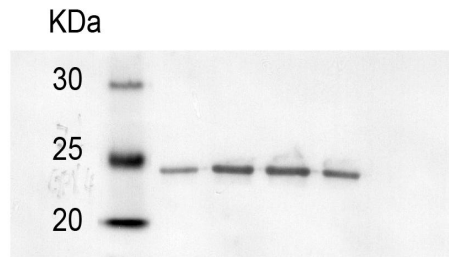

E-cadherin (125KD)

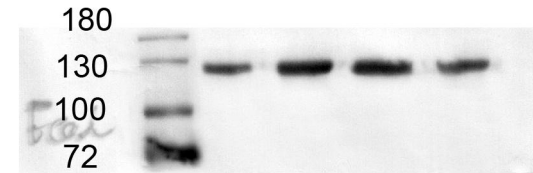

ZO-1 (220KD)

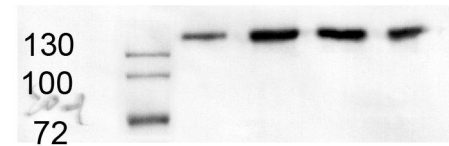

$\beta$ -actin

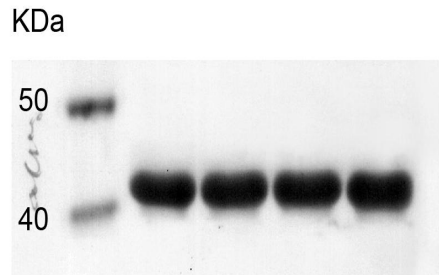

$\beta$ -actin (42KD)

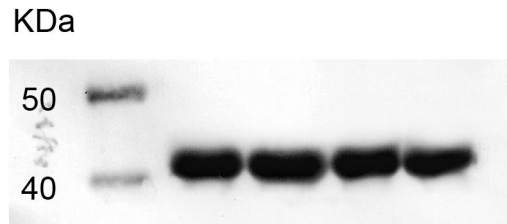

Original Image for Fig 8G

Original Image for Fig 8F



CD9 (23-30KD)

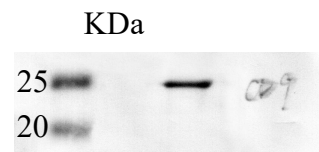

CD63 (28-35KD)

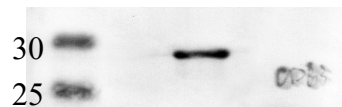

TSG101 (46KD)

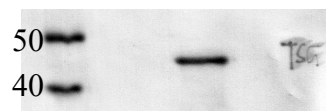

HSP90B1 (100KD)

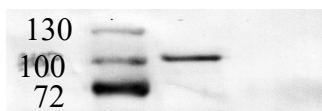

original image for Fig S1C
